# Supplementary material
Source: Springer Nature journal article supplement (https://www.springermedizin.de/resource/supplementary/12890_2010_223_MOESM5_ESM.pdf/9504742)

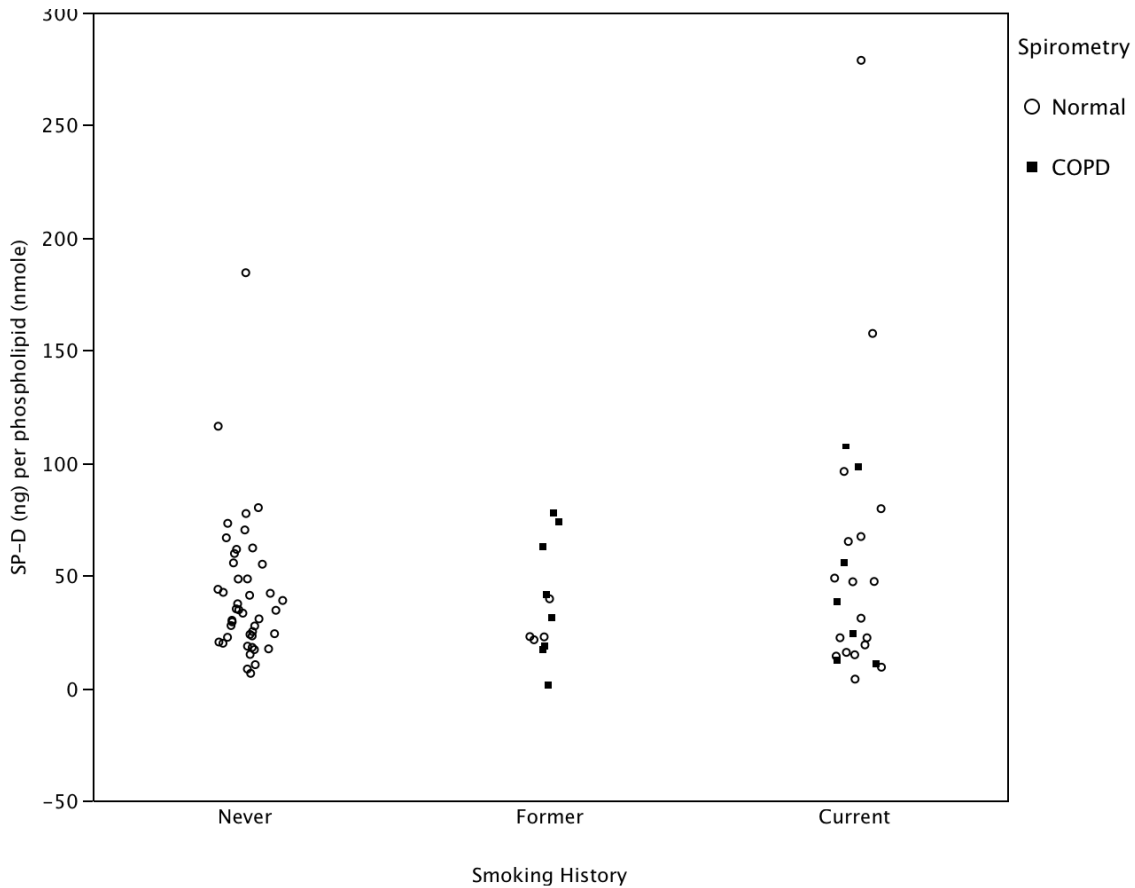

Supplement: MOESM5 [file 9504742]
